# Supplementary material
Source: HighWire-hosted journal article supplement (https://www.cmajopen.ca/highwire/filestream/81055/field_highwire_adjunct_files/0/open-2016-0155-1-at.pdf)
Supplement: open-2016-0155-1-at.pdf [file open-2016-0155-1-at.pdf]

**Appendix 1 (as supplied by the authors): Supplemental tables**

Supplemental Table S1: Characteristics of acute coronary syndromes (ACS) patients by area.

|                                                                          | Cluster 1 |           | Clusters 2 and 3 |         | Rest of Province |         |
|--------------------------------------------------------------------------|-----------|-----------|------------------|---------|------------------|---------|
|                                                                          | n         | (%)       | n                | (%)     | n                | (%)     |
| Total                                                                    | 926       |           | 1,260            |         | 4,156            |         |
| <b>Sex</b>                                                               |           |           |                  |         |                  |         |
| Female                                                                   | 331       | (35.7)    | 465              | (36.9)  | 1,544            | (37.2)  |
| Male                                                                     | 595       | (64.3)    | 795              | (63.1)  | 2,612            | (62.8)  |
| <b>Age</b>                                                               |           |           |                  |         |                  |         |
| mean (SD)                                                                | 64.4      | (13.6)    | 68.5             | (14.0)  | 65.4             | (13.6)  |
| median [IQR]                                                             | 63        | [74.8-54] | 69               | [80-58] | 69               | [77-55] |
| <b>Socio-economic proxy</b>                                              |           |           |                  |         |                  |         |
| Non-subsidized Adults                                                    | 369       | (39.8)    | 382              | (30.3)  | 1,639            | (39.4)  |
| Subsidized Adults                                                        | 118       | (12.7)    | 113              | (9.0)   | 473              | (11.4)  |
| Seniors                                                                  | 439       | (47.4)    | 765              | (60.7)  | 2,044            | (49.2)  |
| <b>Comorbidity Score (based on ≥2 Physician Claims in Prior 2 Years)</b> |           |           |                  |         |                  |         |
| mean (SD)                                                                | 1.09      | (1.5)     | 1.21             | (1.6)   | 1.1              | (1.5)   |
| median [IQR]                                                             | 1         | [2-0]     | 1                | [2-0]   | 1                | [2-0]   |
| <b>≥2 Physician Claims in Prior 2 Years for</b>                          |           |           |                  |         |                  |         |
| COPD                                                                     | 167       | (18)      | 209              | (16.6)  | 633              | (15.2)  |
| Diabetes                                                                 | 218       | (23.5)    | 269              | (21.3)  | 942              | (22.7)  |
| Hypertension                                                             | 467       | (50.4)    | 689              | (54.7)  | 2,114            | (50.9)  |
| Kidney Disease                                                           | 55        | (5.9)     | 74               | (5.9)   | 248              | (6)     |
| ACS                                                                      | 292       | (31.5)    | 439              | (34.8)  | 1,481            | (35.6)  |
| HF                                                                       | 108       | (11.7)    | 193              | (15.3)  | 487              | (11.7)  |
| <b>Hospitalization in Prior 2 Years</b>                                  |           |           |                  |         |                  |         |
| ED Presentation for ACS in Prior 2 Years                                 | 84        | (9.1)     | 143              | (11.3)  | 375              | (9.0)   |

|                                              |      |         |      |          |       |        |
|----------------------------------------------|------|---------|------|----------|-------|--------|
| ED Presentation for HF in Prior 2 Years      | 42   | (4.5)   | 55   | (4.4)    | 150   | (3.6)  |
| Number of GP Claims in Prior 2 Years         |      |         |      |          |       |        |
| mean (SD)                                    | 20.5 | (25.7)  | 22.8 | (27.4)   | 17.2  | (22.2) |
| median [IQR]                                 | 12   | [26-5]  | 13   | [28.2-5] | 13    | [21-4] |
| Specialist Visit in Prior 2 Years            | 441  | (47.6)  | 641  | (50.9)   | 2,405 | (57.9) |
| Number of Specialist Claims in Prior 2 Years |      |         |      |          |       |        |
| mean (SD)                                    | 4.8  | (12.8)  | 4.5  | (9)      | 6.7   | (13.4) |
| median [IQR]                                 | 0    | [4.8-0] | 1    | [5-0]    | 1     | [8-0]  |

Supplemental Table S2: Characteristics of heart failure (HF) patients by area.

|                                                                                           | Cluster 1 |         | Clusters 2 and 3 |         | Rest of Province |         |
|-------------------------------------------------------------------------------------------|-----------|---------|------------------|---------|------------------|---------|
|                                                                                           | n         | (%)     | n                | (%)     | n                | (%)     |
| Total                                                                                     | 677       |         | 510              |         | 3,593            |         |
| <b>Sex</b>                                                                                |           |         |                  |         |                  |         |
| Female                                                                                    | 308       | (45.5)  | 243              | (47.6)  | 1,842            | (51.3)  |
| Male                                                                                      | 369       | (54.5)  | 267              | (52.4)  | 1,751            | (48.7)  |
| <b>Age</b>                                                                                |           |         |                  |         |                  |         |
| mean (SD)                                                                                 | 73.9      | (12.9)  | 79.1             | (11.6)  | 76.7             | (12.2)  |
| median [IQR]                                                                              | 75        | [84-65] | 81               | [87-73] | 81               | [86-69] |
| <b>Socio-economic proxy</b>                                                               |           |         |                  |         |                  |         |
| Non-subsidized Adults                                                                     | 83        | (12.3)  | 47               | (9.2)   | 367              | (10.2)  |
| Subsidized Adults                                                                         | 79        | (11.7)  | 14               | (2.7)   | 256              | (7.1)   |
| Seniors                                                                                   | 515       | (76.1)  | 449              | (88.0)  | 2,970            | (82.7)  |
| <b>Comorbidity Score (based on <math>\geq 2</math> Physician Claims in Prior 2 Years)</b> |           |         |                  |         |                  |         |
| mean (SD)                                                                                 | 2.3       | (1.9)   | 2.3              | (2.0)   | 2.3              | (1.8)   |
| median [IQR]                                                                              | 2         | [3-1]   | 2                | [3-1]   | 2                | [3-1]   |
| <b><math>\geq 2</math> Physician Claims in Prior 2 Years for</b>                          |           |         |                  |         |                  |         |
| COPD                                                                                      | 289       | (42.7)  | 172              | (33.7)  | 1,208            | (33.6)  |
| Diabetes                                                                                  | 248       | (36.6)  | 152              | (29.8)  | 1,220            | (34)    |
| Hypertension                                                                              | 406       | (60)    | 334              | (65.5)  | 2,210            | (61.5)  |
| Kidney Disease                                                                            | 91        | (13.4)  | 80               | (15.7)  | 619              | (17.2)  |
| ACS                                                                                       | 245       | (36.2)  | 167              | (32.7)  | 1,158            | (32.2)  |
| HF                                                                                        | 353       | (52.1)  | 289              | (56.7)  | 1,931            | (53.7)  |
| Hospitalization in Prior 2 Years                                                          | 415       | (61.3)  | 321              | (62.9)  | 2,067            | (57.5)  |
| ED Presentation for ACS in Prior 2 Years                                                  | 64        | (9.5)   | 59               | (11.6)  | 276              | (7.7)   |
| ED Presentation for HF in Prior 2 Years                                                   | 155       | (22.9)  | 105              | (20.6)  | 625              | (17.4)  |
| <b>Number of GP Claims in Prior 2 Years</b>                                               |           |         |                  |         |                  |         |

|                                              |      |         |      |           |       |         |
|----------------------------------------------|------|---------|------|-----------|-------|---------|
| mean (SD)                                    | 43.9 | (42.5)  | 41.3 | (37.8)    | 36.8  | (39.1)  |
| median [IQR]                                 | 31   | [60-15] | 31   | [56.8-14] | 31    | [49-11] |
| Specialist Visit in Prior 2 Years            | 414  | (61.2)  | 312  | (61.2)    | 2,617 | (72.8)  |
| Number of Specialist Claims in Prior 2 Years |      |         |      |           |       |         |
| mean (SD)                                    | 8.3  | (18.3)  | 6.9  | (13.6)    | 11.8  | (19)    |
| median [IQR]                                 | 2    | [9-0]   | 2    | [7-0]     | 2     | [16-0]  |
